# Supplementary material
Source: Springer Nature journal article supplement (https://www.springermedizin.de/resource/supplementary/12885_2010_2758_MOESM1_ESM.pdf/9461878)

TG

TG

TG

TT

GG

TG

Marker

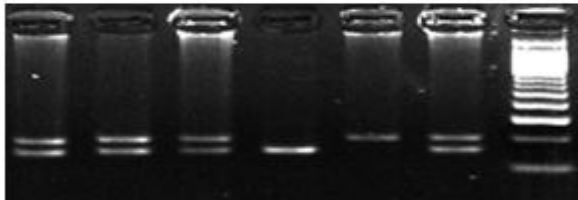

← 150bp

← 100bp

Supplement: MOESM1 [file 9461878]
